# Supplementary material for: The Use of Interferometric Synthetic Aperture Radar for Isolating the Contribution of Major Shocks: The Case of the March 2021 Thessaly, Greece, Seismic Sequence
Source: MDPI journal article supplement (doi:10.3390/geosciences11050191), 2021-04-29
Supplement: s1 [file s1]

## Info Supplementary Materials

This section collects the material deriving from InSAR elaborations carried out with three different processing software.

It was organized according to the following scheme:

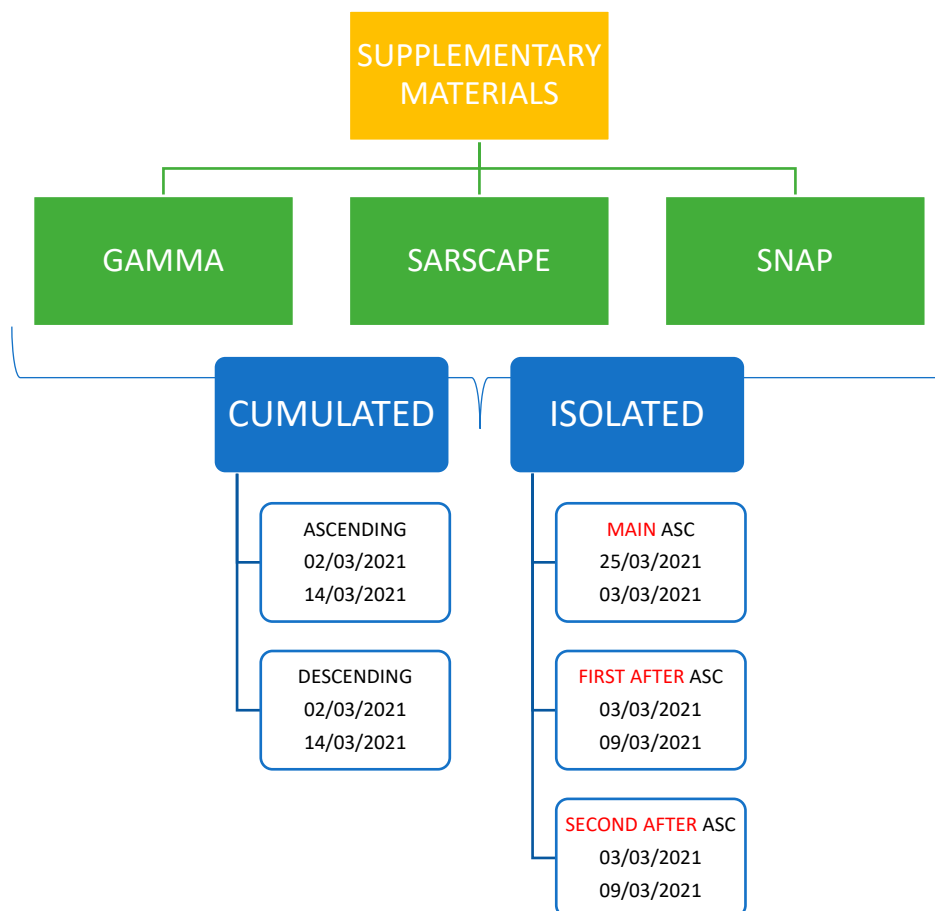

The root folder is named "SUPPLEMENTARY\_MATERIALS".

It is divided into 3 subfolders named as the 3 processing software: "GAMMA", "SARSCAPE" and "SNAP".

Also there is the file called "INFO\_SUPPLEMENTARY\_MATERIALS".

In each of the subfolders there are other subfolders that differentiate the works by Master / Slave pair of images:

- ASCENDING\_02MARCH\_14MARCH\_CUMULATIVE;
- ASCENDING\_03MARCH\_09MARCH\_FIRST\_AFTER;
- ASCENDING\_09MARCH\_15MARCH\_SECOND\_AFTER;
- ASCENDING\_25FEBRUARY\_03MARCH\_MAIN;
- DESCENDING\_02MARCH\_14MARCH\_CUMULATIVE;

There are two files in each of these folders:

- Interferogram;
- Displacement.
